# Supplementary material for: Intermolecular electron transfer promoted by directional donor–acceptor attractions in self-assembled diketopyrrolopyrrole-thiophene films
Source: Royal Society of Chemistry journal article supplement (doi:10.1039/c2cp41288h), 2012-01-01
Supplement: c2cp41288h.pdf [file c2cp41288h.pdf]

# Supporting Information

## **Intermolecular electron transfer promoted by directional donor acceptor attractions in self-assembled diketopyrrolopyrrole-thiophene film**

*Huiying Liu<sup>a,b</sup>, Hui Jia<sup>a,b</sup>, Lanfen Wang<sup>a</sup>, Yi-Shi Wu<sup>\*a</sup>, Chuanlang Zhan<sup>\*a</sup>,*

*Hongbing Fu<sup>\*a</sup> and Jiannian Yao<sup>a</sup>*

<sup>a</sup> Beijing National Laboratory for Molecular Sciences, State key laboratory for structural chemistry of unstable and stable species, CAS Key Laboratory of Photochemistry, Institute of Chemistry, Chinese Academy of Sciences, Beijing, 100190, P. R. China

<sup>b</sup> Graduate University of Chinese Academy of Sciences, Beijing, 100039, P. R. China

\*Corresponding authors. Tel: +86-10-82616517, Fax: +86-10-82616517;

E-mail: [yswu@iccas.ac.cn](mailto:yswu@iccas.ac.cn); [hongbing.fu@iccas.ac.cn](mailto:hongbing.fu@iccas.ac.cn)

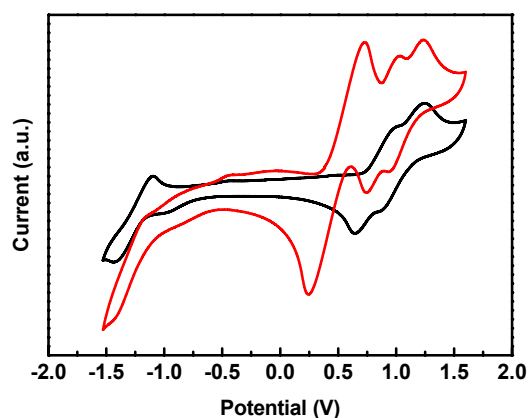

**Fig. S1** Cyclic voltammetry of DPP-BT in  $\text{CH}_2\text{Cl}_2$  (black), DPP-BT and ferrocene (red), platinum wire as the counter electrode, with Pt-C working electrode, Ag/AgCl, as the reference electrode ( $-0.49 \text{ V vs Fc/Fc}^+$ ),  $n\text{-Bu}_4\text{NPF}_6$  (0.1 M) as the supporting electrolyte and scan rate 100 mV/s.

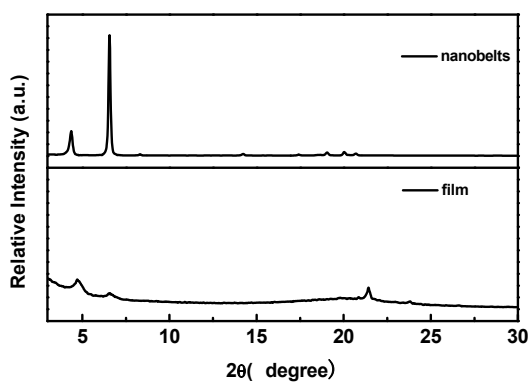

**Fig. S2** X-ray diffraction pattern of DPP-BT nanobelts and film.

**Table S1** Time decay of the transient absorption at 710 nm, 770 nm and 830 nm for DPP-BT

| Compounds                          | 710 nm        | 770 nm        | 830 nm        |
|------------------------------------|---------------|---------------|---------------|
|                                    | $\tau_f$ (ps) | $\tau_f$ (ps) | $\tau_f$ (ps) |
| In CH <sub>2</sub> Cl <sub>2</sub> | 1.38±0.1      | 323±43        | 270.2±227     |
|                                    | 124±17        | 1787±72       | 1606.2±452    |
|                                    | 1904±128      |               |               |
| In film                            | 1.8±0.5       | 1.6±0.2       | 0.58±0.07     |
|                                    | 41±6          | 26.8±11       | 7.7±1.4       |
|                                    | 2042±619      | 162±646       | 76.5±10       |
